# Supplementary material
Source: Frontiers journal article supplement (https://www.frontiersin.org/articles/568744)
Supplement: Data_Sheet_1.pdf [file Data_Sheet_1.pdf]

## Appendix

The mass matrix  $\mathbf{M}$ , stiffness matrix  $\mathbf{K}$ , damping matrix  $\mathbf{C}$ , and force vector  $\mathbf{F}$  in Eq. (24) are expressed as

$$\mathbf{M} = \begin{bmatrix} \mathbf{M}_{NN} & \mathbf{M}_{NI} & \mathbf{0} \\ \mathbf{M}_{IN} & \mathbf{M}_{II}^N + \mathbf{M}_{II}^E & \mathbf{M}_{IE} \\ \mathbf{0} & \mathbf{M}_{EI} & \mathbf{M}_{EE} \end{bmatrix} \quad (34)$$

with

$$\begin{aligned} \mathbf{M}_{NN} &= \mathbf{diag}(m_1, m_2, m_3, m_4, m_5, m_6) \\ \mathbf{M}_{IN} = \mathbf{M}_{NI}^T &= \begin{bmatrix} 0 & 0 & 0 & m_{47} & m_{47} & m_{47} \\ m_{18} & m_{28} & m_{38} & 0 & 0 & 0 \end{bmatrix} \\ \mathbf{M}_{II}^N &= (3m_0 + M_{nac} + M_{hub}) \cdot \mathbf{I} \end{aligned}$$

where  $\mathbf{diag}(\cdot)$  indicates a diagonal matrix;  $\mathbf{I}$  indicates identity matrix;  $m_1 = m_2 = m_3 = \int_0^R \bar{m} \phi_{1e}^2 dr$ ,  $m_4 = m_5 = m_6 = \int_0^R \bar{m} \phi_{1f}^2 dr$ ,  $m_{47} = m_{57} = m_{67} = \int_0^R \bar{m} \phi_{1f} dr$ ,  $m_{j8} = \int_0^R \bar{m} \phi_{1e} dr \cos \psi_j$ , ( $j = 1, 2, 3$ ).

$$\mathbf{K} = \begin{bmatrix} \mathbf{K}_{NN} & \mathbf{K}_{NI} & \mathbf{0} \\ \mathbf{K}_{IN} & \mathbf{K}_{II}^N + \mathbf{K}_{II}^E & \mathbf{K}_{IE} \\ \mathbf{0} & \mathbf{K}_{EI} & \mathbf{K}_{EE} \end{bmatrix} \quad (35)$$

with

$$\begin{aligned} \mathbf{K}_{NN} &= \mathbf{diag}(k_{b1,eg}, k_{b2,eg}, k_{b3,eg}, k_{b1,fp}, k_{b2,fp}, k_{b3,fp}) \\ \mathbf{K}_{IN} &= \begin{bmatrix} 0 & 0 & 0 & 0 & 0 & 0 \\ -\Omega^2 m_{18} & -\Omega^2 m_{28} & -\Omega^2 m_{38} & 0 & 0 & 0 \end{bmatrix} \\ \mathbf{K}_{NI} &= \mathbf{0} \\ \mathbf{K}_{II}^N &= \mathbf{0} \end{aligned}$$

where  $k_{bj,eg} = k_{eg} + k_{ge,eg} - k_{gr,eg} \cos \psi_j - \Omega^2 \int_0^R \bar{m} \phi_{1e}^2 dr$ ,  $k_{bj,fp} = k_{fp} + k_{ge,fp} - k_{gr,fp} \cos \psi_j$ , ( $j = 1, 2, 3$ ).

$$\mathbf{C} = \begin{bmatrix} \mathbf{C}_{NN} & \mathbf{C}_{NI} & \mathbf{0} \\ \mathbf{C}_{IN} & \mathbf{C}_{II}^N + \mathbf{C}_{II}^E & \mathbf{C}_{IE} \\ \mathbf{0} & \mathbf{C}_{EI} & \mathbf{C}_{EE} \end{bmatrix} \quad (36)$$

with

$$\begin{aligned} \mathbf{C}_{NN} &= \mathbf{diag}(c_{b1,eg}, c_{b2,eg}, c_{b3,eg}, c_{b1,fp}, c_{b2,fp}, c_{b3,fp}) \\ \mathbf{C}_{IN} &= \begin{bmatrix} 0 & 0 & 0 & 0 & 0 & 0 \\ -2\Omega \bar{m}_1 & -2\Omega \bar{m}_2 & -2\Omega \bar{m}_3 & 0 & 0 & 0 \end{bmatrix} \\ \mathbf{C}_{NI} &= \mathbf{0} \\ \mathbf{C}_{II}^N &= \mathbf{diag}(c_{aero,x}, c_{aero,y}) \end{aligned}$$

where  $\bar{m}_j = \int_0^R \bar{m} \phi_{1e} dr \sin \psi_j$ , ( $j = 1, 2, 3$ ).

$$\mathbf{F} = \begin{bmatrix} \mathbf{F}_N \\ \mathbf{F}_I^N + \mathbf{F}_I^E \\ \mathbf{F}_E \end{bmatrix} \quad (37)$$

with

$$\begin{aligned} \mathbf{F}_N &= [Q_{wind,1} \quad Q_{wind,2} \quad Q_{wind,3} \quad Q_{wind,4} \quad Q_{wind,5} \quad Q_{wind,6}]^T \\ \mathbf{F}_I^N &= [Q_{wind,7} \quad Q_{wind,8}]^T \\ \mathbf{F}_I^E &= \mathbf{0} \\ \mathbf{F}_E &= \mathbf{F}_{wave} \end{aligned}$$

where  $Q_{wind,j} = \int_0^R p_{Tj}(r, t) \phi_{1e} dr$ ,  $Q_{wind,j+3} = \int_0^R p_{Nj}(r, t) \phi_{1f} dr$ , ( $j = 1, 2, 3$ );

$Q_{wind,7} = \sum_{j=1}^3 \int_0^R p_{Nj}(r, t) dr$ ,  $Q_{wind,8} = \sum_{j=1}^3 \int_0^R p_{Tj}(r, t) dr \cos \psi_j$ ;  $\mathbf{F}_{wave}$  is the global force vector assembled from  $\mathbf{F}_{wave,i}$  shown in Eq. (20).

In the above Eqs. (34)-(36),  $\mathbf{M}_{II}^E$ ,  $\mathbf{M}_{IE}$ ,  $\mathbf{M}_{IE}$ ,  $\mathbf{K}_{II}^E$ ,  $\mathbf{K}_{IE}$ ,  $\mathbf{K}_{IE}$ ,  $\mathbf{C}_{II}^E$ ,  $\mathbf{C}_{IE}$ , and  $\mathbf{C}_{IE}$  are all defined by partitioning the mass  $\mathbf{M}_{tow}$ , stiffness  $\mathbf{K}_{tow}$ , and damping  $\mathbf{C}_{tow}$  matrices of the tower FE model obtained in Sec. “FE model for tower including foundation”. More specifically, they are

$$\begin{aligned} \begin{bmatrix} \mathbf{M}_{II}^E & \mathbf{M}_{IE} \\ \mathbf{M}_{EI} & \mathbf{M}_{EE} \end{bmatrix} &= \mathbf{M}_{tow} \\ \begin{bmatrix} \mathbf{K}_{II}^E & \mathbf{K}_{IE} \\ \mathbf{K}_{EI} & \mathbf{K}_{EE} \end{bmatrix} &= \mathbf{K}_{tow} \\ \begin{bmatrix} \mathbf{C}_{II}^E & \mathbf{C}_{IE} \\ \mathbf{C}_{EI} & \mathbf{C}_{EE} \end{bmatrix} &= \mathbf{C}_{tow} \end{aligned} \quad (38)$$

where the subscripts “I”, “N” and “E” indicate the DOFs are related to the interfacing system, numerical component, and experimental component of the proposed RTHS framework, respectively; the superscripts “E” and “N” indicate the term originates from the experimental component or from the numerical component.
